# Supplementary material for: IRAG1 Deficient Mice Develop PKG1β Dependent Pulmonary Hypertension
Source: MDPI journal article supplement (doi:10.3390/cells9102280), 2020-10-13
Supplement: s1 [file s1]

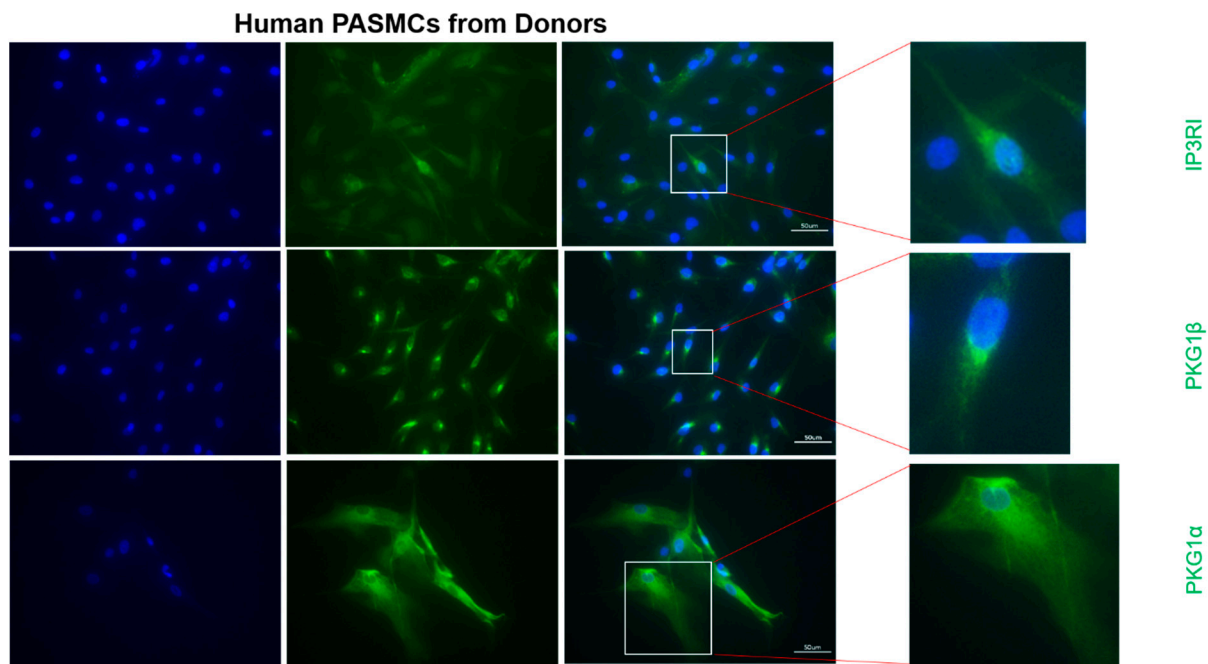

Figure S1. Immunostaining of hPASMCs from Donor confirm perinuclear and cytoplasmic localization of IP3RI, PKG1 $\beta$ , and PKG1 $\alpha$ . Primary antibodies used - IP3RI (green, upper panel), PKG1 $\beta$  (green, middle panel), and PKG1 $\alpha$  (green, lower panel). Nucleus was stained by DAPI (blue). Scale indicates 50  $\mu$ m.
